# Supplementary material for: Decreased Functional Connectivities of Low-Degree Level Rich Club Organization and Caudate in Post-stroke Cognitive Impairment Based on Resting-State fMRI and Radiomics Features
Source: Front Neurosci. 2022 Feb 16;15:796530. doi: 10.3389/fnins.2021.796530 (PMC8890030; doi:10.3389/fnins.2021.796530)
Supplement: Supplementary file 1 [file Table_1.XLSX]

## Sheet: Sheet1
Brain region		t value	p value
4	71	-6.36439	3.31436e-07
20	71	-4.44534	9.35753e-05
33	71	-5.46357	4.69488e-06
34	71	-4.94754	2.15286e-05
43	71	-3.84497	0.000521283
48	71	-4.03202	0.000307193
71	78	-5.27713	8.14414e-06
77	78	-3.96085	0.000375951
71	90	-4.03047	0.000308551
