# Supplementary material for: Decreased Functional Connectivities of Low-Degree Level Rich Club Organization and Caudate in Post-stroke Cognitive Impairment Based on Resting-State fMRI and Radiomics Features
Source: Front Neurosci. 2022 Feb 16;15:796530. doi: 10.3389/fnins.2021.796530 (PMC8890030; doi:10.3389/fnins.2021.796530)
Supplement: Supplementary file 2 [file Table_2.XLSX]

## Sheet: Sheet1
Brain region			t value		p value
35	36		-4.86249		2.76467e-05
39	40		-4.34612		0.000124745
41	42		-3.98787		0.000348241
57	58		-3.99869		0.000337706
1	71		-4.12583		0.000235074
2	71		-4.10803		0.000247348
3	71		-5.86767		1.42426e-06
5	71		-5.71947		2.20498e-06
6	71		-4.66986		4.86355e-05
7	71		-7.20474		2.92738e-08
8	71		-5.0834		1.44269e-05
9	71		-6.27586		4.29361e-07
10	71		-3.83641		0.000533968
11	71		-4.79842		3.33704e-05
12	71		-4.58411		6.24805e-05
13	71		-4.94991		2.13784e-05
14	71		-3.78236		0.000621267
15	71		-5.17292		1.10781e-05
16	71		-4.00153		0.000335002
17	71		-4.33223		0.000129856
18	71		-4.20699		0.000186284
19	71		-4.80519		3.27138e-05
21	71		-5.05166		1.58422e-05
22	71		-6.02098		9.06959e-07
23	71		-6.82292		8.75089e-08
24	71		-6.84439		8.22529e-08
25	71		-5.42144		5.31717e-06
26	71		-5.44354		4.98114e-06
27	71		-5.27478		8.20081e-06
28	71		-4.92242		2.31797e-05
31	71		-3.87598		0.00047776
32	71		-4.42256		9.99721e-05
38	71		-4.35251		0.000122459
39	71		-4.33713		0.000128028
40	71		-4.50949		7.76569e-05
41	71		-4.77477		3.57676e-05
42	71		-4.72146		4.18167e-05
44	71		-4.18232		0.000199955
65	71		-3.77485		0.000634441
66	71		-4.50196		7.93778e-05
23	72		-4.36155		0.000119301
24	72		-4.42659		9.88103e-05
41	72		-4.8367		2.98227e-05
71	73		-6.22848		4.93262e-07
72	73		-4.57994		6.3246e-05
71	74		-6.15364		6.14275e-07
72	74		-3.89941		0.000447235
71	75		-5.97554		1.03668e-06
72	75		-4.77022		3.62484e-05
71	76		-7.10024		3.94486e-08
72	76		-4.57483		6.41962e-05
71	77		-4.77561		3.56794e-05
72	77		-3.99511		0.000341155
71	79		-3.79186		0.000604978
71	80		-4.70974		4.32769e-05
71	81		-4.14671		0.000221438
71	82		-5.16317		1.14015e-05
71	83		-4.7047		4.39203e-05
71	85		-4.5867		6.20102e-05
71	86		-4.30019		0.000142441
71	88		-3.88888		0.000460707
71	89		-4.53452		7.21989e-05
71	95		-3.85149		0.00051183
27	105		-4.30536		0.000140331
71	105		-4.20063		0.000189718
27	106		-4.31066		0.000138201
71	106		-3.92393		0.000417332
1	109		-3.81776		0.000562643
71	109		-4.45776		9.026e-05
74	109		-4.04387		0.000297012
76	109		-3.83623		0.000534244
