# Supplementary material for: Decreased Functional Connectivities of Low-Degree Level Rich Club Organization and Caudate in Post-stroke Cognitive Impairment Based on Resting-State fMRI and Radiomics Features
Source: Front Neurosci. 2022 Feb 16;15:796530. doi: 10.3389/fnins.2021.796530 (PMC8890030; doi:10.3389/fnins.2021.796530)
Supplement: Supplementary file 3 [file Table_3.XLSX]

## Sheet: Sheet1
Brain region		t value		p value
20	29	-3.57999		0.000960007
47	57	-4.29547		0.000116416
48	57	-4.21006		0.000150679
20	63	-3.82155		0.000477666
4	71	-4.91003		1.75779e-05
20	71	-5.14987		8.30565e-06
33	71	-5.3201		4.86607e-06
34	71	-5.39453		3.84968e-06
47	71	-3.63153		0.000828331
48	71	-4.1137		0.000201235
55	71	-4.88803		1.88242e-05
56	71	-4.22594		0.000143637
67	71	-3.50524		0.0011873
71	78	-5.57027		2.21207e-06
77	78	-4.48073		6.62263e-05
20	81	-3.7151		0.000651028
20	83	-4.63351		4.14201e-05
71	90	-3.57153		0.000983465
71	99	-4.82635		2.28044e-05
71	100	-4.59351		4.68506e-05
