# Supplementary material for: Decreased Functional Connectivities of Low-Degree Level Rich Club Organization and Caudate in Post-stroke Cognitive Impairment Based on Resting-State fMRI and Radiomics Features
Source: Front Neurosci. 2022 Feb 16;15:796530. doi: 10.3389/fnins.2021.796530 (PMC8890030; doi:10.3389/fnins.2021.796530)
Supplement: Supplementary file 5 [file Table_5.XLSX]

## Sheet: Sheet1
feeder & MMSE					feeder & MOCA					local & MOCA
Brain region		r	p		Brain region		r	p		Brain region		r	p
45	33	0.841167	4.44457e-05		48	1	0.85531	2.40706e-05		44	1	0.840986	4.47795e-05
45	34	0.86024	1.91454e-05		48	19	0.89727	2.45824e-06		46	1	0.873053	1.01195e-05
					45	20	0.825898	8.09525e-05		50	1	0.830134	6.89497e-05
					36	34	0.820272	9.9543e-05		57	54	0.83359	6.0294e-05
					45	34	0.850969	2.92472e-05		2	13	0.823759	8.76457e-05
					57	48	0.83025	6.86448e-05		57	13	0.823329	8.90473e-05
					57	56	0.842638	4.18163e-05		44	19	0.835217	5.65448e-05
										46	19	0.829106	7.17171e-05
										75	19	0.824086	8.6595e-05
										57	30	0.842106	4.2751e-05
										89	35	0.83321	6.11985e-05
