# Supplementary material for: Decreased Functional Connectivities of Low-Degree Level Rich Club Organization and Caudate in Post-stroke Cognitive Impairment Based on Resting-State fMRI and Radiomics Features
Source: Front Neurosci. 2022 Feb 16;15:796530. doi: 10.3389/fnins.2021.796530 (PMC8890030; doi:10.3389/fnins.2021.796530)
Supplement: Supplementary file 6 [file Table_6.XLSX]

## Sheet: Sheet1
local & MMSE					local & MOCA
Brain region		r	p		Brain region		r	p
64	17	0.771248	4.25698e-05		77	5	0.768189	4.76711e-05
63	60	0.789394	2.09634e-05		82	29	0.757419	7.0093e-05
87	63	0.761308	6.11226e-05
83	63	0.750321	8.94251e-05
