# Supplementary material for: Decreased Functional Connectivities of Low-Degree Level Rich Club Organization and Caudate in Post-stroke Cognitive Impairment Based on Resting-State fMRI and Radiomics Features
Source: Front Neurosci. 2022 Feb 16;15:796530. doi: 10.3389/fnins.2021.796530 (PMC8890030; doi:10.3389/fnins.2021.796530)
Supplement: Supplementary file 9 [file Table_9.XLSX]

## Sheet: Sheet1
		Elongation	Flatness	LeastAxisLength	MajorAxisLength	Maximum2DDiameterColumn	Maximum2DDiameterRow	Maximum2DDiameterSlice	Maximum3DDiameter	MeshVolume	MinorAxisLength	Sphericity	SurfaceArea	SurfaceVolumeRatio	VoxelVolume	10Percentile	90Percentile	Energy	Entropy	InterquartileRange	Kurtosis	Maximum	MeanAbsoluteDeviation	Mean	Median	Minimum	Range	RobustMeanAbsoluteDeviation	RootMeanSquared	Skewness	TotalEnergy	Uniformity	Variance
PreCG.L	SMN	0	0	0	0	0	0	0	0	0	0	0	0	0	0	-0.477092	0	0	0	0	0	0	0	0	0	0	0	0	0	0.480714	0	0	0.478588	1
PreCG.R	SMN	0	0	0	0	0	0	0	0	0	0	0	0	0	0	0	0	0	0	0	0	0	0	0	0	0	0	0	0	0.451711	0	0	0	2
SMA.L	SMN	0	0	0	0	0	0	0	0	0	0	0	0	0	0	0	0	0	0.464601	0	0.483051	0.451304	0	0	0	0	0.485985	0	0	0.509686	0	-0.458169	0.550535	19
MOG.L	VN	0	0	0	0	0	0	0	0	0	0	0	0	0	0	-0.450997	0	0	0	0	0	0	0	0	0	0	0	0	0	0	0	0	0	51
MFG.L	ExN	0	-0.450654	0	0.506126	0	0	0	0	0	0	0	0	0	0	0	0	0	0	0	0	0	0	0	0	0	0	0	0	0	0	0	0	7
MFG.R	ExN	0	-0.493025	0	0.457309	0	0	0	0	0	0	0	0	0	0	0	0	0	0	0	0	0	0	0	0	0	0	0	0	0	0	0	0	8
IFGoperc.L	ExN	0	0	0	0.578764	0.638491	0.649025	0.47256	0.596341	0	0.573932	-0.461325	0.474225	0	0	-0.683869	0	0	0	0.62205	0	0	0.556945	-0.553598	-0.526176	-0.591429	0	0.617101	-0.496651	0	0	-0.520048	0.452752	11
IFGtriang.L	ExN	0	0	0	0.541516	0.557882	0.584721	0	0.514146	0	0.507432	0	0	0	0	-0.584174	0	0	0	0.552195	0	0	0.479326	-0.495521	-0.486919	-0.494556	0	0.551224	-0.45001	0	0	0	0	13
SFGmed.R	DMN	0	-0.514056	0	0.520608	0	0	0	0	0	0	0	0	0	0	0	0	0	0	0	0	0	0	0	0	0	0	0	0	0	0	0	0	24
ACG.R	DMN	0	0	0	0	0	0	0	0	0	0.502492	0	0.47816	0	0	0	0	0	0	0	0	0	0	0	0	0	0	0	0	0	0	0	0	32
PHG.L	DMN	0	0	0	0	0	0	0	0	0.483038	0	0	0.53628	0	0.483955	0	0	0	0	0	0	0	0	0	0	0	0	0	0	0	0	0	0	39
PHG.R	DMN	0	0	0	0	0	0	0	0	0	0	0	0.522651	0	0	0	0	0	0	0	0	0	0	0	0	0	0	0	0	0	0	0	0	40
IPL.L	DMN	0	0	0	0	0	0	0	0	0	0	0	0	0	0	-0.435399	0	0	0	0	0	0	0	0	0	0	0	0	0	0	0	0	0	61
IPL.R	DMN	0	0	0	0.49764	0.445727	0	0	0	0	0	0	0	0	0	-0.672371	-0.582597	0	0	0	0	0	0	-0.667015	-0.64293	-0.44328	0	0	-0.638725	0	0	0	0	62
SMG.R	DMN	0	0	0	0	0	0	0	0	0	0	0	0	0	0	0	0	0	0	0	0	0	0	0	0	0	0	0	0	0.456476	0	0	0	64
ITG.L	DMN	0	0	0	0.515779	0	0	0	0	0	0	0	0	0	0	-0.452362	0	0	0	0	0	0	0	0	0	0	0	0	0	0	0	0	0	89
INS.L	SN	0	0	0	0	0	0	0	0	0	0	0	0	0	0	0	0	0	0	0	0	0	0	0	-0.434823	0	0	0	0	0	0	0	0	29
AMYG.L	SN	0	0	0	0	0	0	0	0	0	0	0	0	0	0	0	0	0	0	0	0	0	0	0	0	0	0	0	0	-0.447241	0	0	0	41
PUT.R	SN	0	0	0	0	0	0	0	0	0	0	0	0	0	0	0	0	0	0	0	0	0	0	0	0	0	0	0	0	0.433632	0	0	0	74
PAL.L	SN	0	0	0	0	0	0	0	0	0	0	0	0	0	0	0	0	0	0	0	0.551391	0.447036	0	0	0	0	0.445036	0	0	0.532814	0	0	0	75
PAL.R	SN	0	0	0	0	0	0	0	0	0	0	0	0	0	0	0	0	0	0	0	0	0	0	0	0	0	0	0	0	0	0	0	0.434765	76
STG.L	SN	0	0	0	0	0	0	0	0	0	0	0	0	0	0	0	0	0	0	0	0	0	0	0	0	0	0	0	0	-0.435979	0	0	0	81
STG.R	SN	0	0	0	0	0	0	0	0	0	0	0	0.44451	0	0	0	0	0	0	0	0	0	0	0	0	0	0	0	0	0	0	0	0	82
TPOsup.L	SN	0	0	0	0	0	0	0	0	0.483839	0	0	0	-0.559246	0.48293	0	0	0	0	0	0	0	0	0	0	0	0	0	0	0	0	0	0	83
TPOsup.R	SN	0	0	0	0	0	0	0	0	0	0	0	0	0	0	0	0	0	0	-0.444719	0	0	-0.436278	0	0	0	0	-0.442209	0	0	0	0	-0.460514	84
TPOmid.L	SN	0	0	0	0.447112	0.482759	0.440202	0	0.4924	0	0	0	0	0	0	-0.505268	0	0.451005	0	0	0	0	0	0	0	-0.545407	0	0	0	0	0.451005	-0.456917	0	87
TPOmid.R	SN	0	0	0	0	0	0	0	0	0	0.457008	0	0.542795	0	0	0	0	0	0	0	0	0	0	0	0	0	0	0	0	0	0	0	0	88
ORBmid.R	ORB	-0.49348	-0.499881	0	0	0	0	0	0	0	0	0	0	0	0	0	0	0	0	0	0	0	0	0	0	0	0	0	0	0	0	0	0	10
ORBinf.L	ORB	0	0	0.614924	0	0.485801	0.482632	0.492919	0.480095	0.619975	0.574214	0	0.626833	0	0.620451	-0.588771	0	0.478615	0	0	0	0	0	-0.54508	-0.579024	-0.549953	0	0	-0.51317	0	0.478615	0	0	15
Cerebelum_7b_R	CN	0	0	0	0	0	0	0	0	0	0	0	0	0	0	0	0	0	0	0	0.468568	0	0	0	0	0	0	0	0	0.472061	0	0	0	102
Cerebelum_8_R	CN	0	-0.490415	0	0	0	0	0	0	0	0	0	0	0	0	0	0	0	0	0	0.484707	0	0	0	0	0	0	0	0	0	0	0	0	104
Cerebelum_9_L	CN	0	0	0	0	0	0	0	0	0	0	0	0	0	0	0	0	0	0	0	0.603235	0	0	0	0	0	0	0	0	0.473097	0	0	0	105
Cerebelum_10_R	CN	0	0	-0.536021	0	0	0	-0.44551	0	0	0	0	0	0	0	0	0	0	0	-0.563992	0.448331	0	-0.468634	0	0	0	0	-0.546081	0	0	0	0	0	108
Vermis_6	CN	0	0	0	0	0	0	0	0	0	0	0	0	0.442164	0	0	0	-0.447737	0	0	0	0	0	0	0	0	0	0	0	0	-0.447737	0	0	112
